# Supplementary material
Source: ML conference proceedings conference paper supplement (https://openreview.net/forum?id=LL_LfK7dfpR)
Supplement: supplementary_material [file attachment]

## A Appendix

## B Published and reproduced models

We reproduce the state-of-the-art models for SF and ID. The resulting trained models obtain similar results to the published, as shown in Appendix Table 1.

| Test Set        | ATIS |      | SNIPS |       | NLU-ED |      |
|-----------------|------|------|-------|-------|--------|------|
|                 | Slot | Int. | Slot  | Int.  |        |      |
| Stack-Prop+BERT |      |      |       |       |        |      |
| Published       | 96.1 | 97.5 | 97.0  | 99.0  | na     | na   |
| Reproduced      | 95.7 | 96.5 | 95.0  | 98.2  | 74.0   | 85.1 |
| Bi-RNN          |      |      |       |       |        |      |
| Published       | 94.9 | 97.6 | 89.4* | 97.1* | na     | na   |
| Reproduced      | 95.7 | 96.5 | 95.0  | 98.3  | 65.8   | 78.8 |

Table 1: Published and reproduced SF and ID results. The numbers with \* indicate that the scores were not published in the original [?] paper but in [?].

## C Survey

In Appendix Tables 1a and 1b We show the instructions and an excerpt of the sentences, as presented to the surveyed participants<sup>1</sup>.

## D Complete table of NATURE operators applied to ATIS, SNIPS and NLU-ED

In the Appendix Tables 3 and ?? we present all obtained scores ran on 2 models trained on the original train and validation sets of ATIS, SNIPS and NLU-ED and evaluated on the original, random and hard altered test sets.

## E Complete NATURE operators applied to Data Augmented versions of ATIS, SNIPS and NLU-ED

In the Appendix Table 4 we compare our NATURE operators and common automatic DA strategies from the NLPaug library. In the Appendix Table 5

<sup>1</sup>We asked the participants to rate the fluency of each utterance (from 1 to 5) in order to average it over the control utterances. Allowing us to establish the annotator capacity of our volunteer participants. We expected this metric to reflect the high quality of the cherry-picked control utterances. As expected, our participants score remained between 4.2 and 5 out of 5.

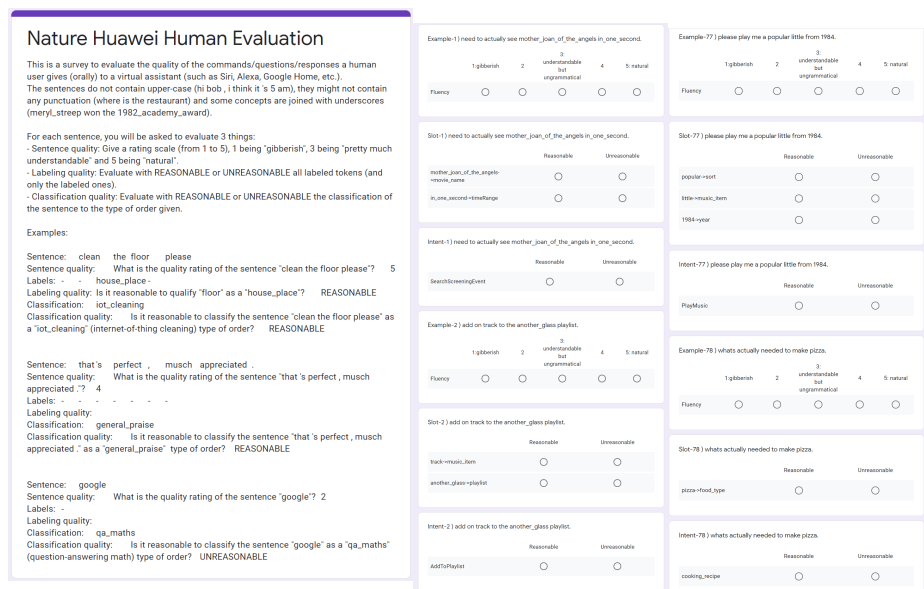

(a) Print-screen of the survey instructions. (b) Print-screen excerpts of the survey.

we present all obtained scores ran on 2 models trained on a Data Augmented version of ATIS, SNIPS and NLU-ED.

| Participant<br>Id | Group 1 |      |      |      |      |      |      | Group 2 |      |      |      |      |      |      |
|-------------------|---------|------|------|------|------|------|------|---------|------|------|------|------|------|------|
|                   | 1       | 2    | 3    | 4    | 5    | 6    | 7    | 8       | 9    | 10   | 11   | 12   | 13   | 14   |
| Experiment        |         |      |      |      |      |      |      |         |      |      |      |      |      |      |
| Slot              | 95.3    | 96.9 | 95.3 | 91.3 | 94.5 | 96.1 | 92.1 | 86.1    | 98.3 | 98.2 | 95.7 | 90.4 | 97.4 | 90.4 |
| Intent            | 83.3    | 93.3 | 87.9 | 83.3 | 90.0 | 91.7 | 93.3 | 76.7    | 90.0 | 88.1 | 93.2 | 87.7 | 84.5 | 81.4 |
| Control           |         |      |      |      |      |      |      |         |      |      |      |      |      |      |
| Fluency           | 4.9     | 5    | 4.8  | 4.6  | 4.9  | 4.7  | 4.5  | 4.2     | 4.3  | 5    | 5    | 4.9  | 4.8  | 4.2  |
| Slot              | 89.5    | 89.5 | 100  | 94.7 | 100  | 94.7 | 89.5 | 94.7    | 100  | 100  | 100  | 100  | 94.7 | 89.5 |
| Intent            | 91.7    | 100  | 100  | 100  | 100  | 100  | 91.7 | 91.7    | 100  | 100  | 100  | 90.9 | 100  | 100  |

Table 2: Survey results and statistics per participant. The average slot score and the average intent score appear as percentages, the average sentence fluency score appears as a scale from 1 to 5.

| Test Set        | ATIS         |                 |              | SNIPS        |                 |              | NLU-ED       |                 |              |
|-----------------|--------------|-----------------|--------------|--------------|-----------------|--------------|--------------|-----------------|--------------|
|                 | Slot<br>(F1) | Intent<br>(Acc) | E2E<br>(Acc) | Slot<br>(F1) | Intent<br>(Acc) | E2E<br>(Acc) | Slot<br>(F1) | Intent<br>(Acc) | E2E<br>(Acc) |
| Stack-Prop+BERT |              |                 |              |              |                 |              |              |                 |              |
| Original        | 95.7         | 96.5            | 86.2         | 95.0         | 98.3            | 87.9         | 74.0         | 85.1            | 67.8         |
| Random          | 91.3         | 95.0            | 66.5         | 83.4         | 96.1            | 53.8         | 67.4         | 76.1            | 56.8         |
|                 | $\pm 0.1$    | $\pm 0.3$       | $\pm 1.0$    | $\pm 0.5$    | $\pm 0.3$       | $\pm 3.2$    | $\pm 0.1$    | $\pm 0.2$       | $\pm 0.2$    |
| Hard            | 82.3         | 90.7            | 34.9         | 70.6         | 95.3            | 12.9         | 55.5         | 62.7            | 38.9         |
| Bi-RNN          |              |                 |              |              |                 |              |              |                 |              |
| Original        | 94.7         | 97.6            | 84.3         | 88.9         | 97.6            | 77.3         | 65.9         | 82.1            | 61.9         |
| Random          | 89.9         | 94.3            | 61.8         | 75.6         | 94.1            | 39.0         | 60.6         | 70.8            | 50.1         |
|                 | $\pm 0.1$    | $\pm 0.1$       | $\pm 1.6$    | $\pm 0.5$    | $\pm 0.1$       | $\pm 2.5$    | $\pm 0.4$    | $\pm 0.4$       | $\pm 0.3$    |
| Hard            | 79.9         | 92.0            | 27.6         | 62.4         | 92.9            | 7.0          | 49.6         | 58.8            | 34.5         |

Table 3: Stack-Prop+BERT and Bi-RNN performances for ATIS, SNIPS and NLU-ED. We report F1 slot filling, accuracy for intent detection and end-to-end accuracy overall. The reported scores of the Random altered test set are a mean of 10 random distribution of processes and is accompanied by the variance score.

| Original: find a tv series called armageddon summer |                                                                         |              |                                                          |
|-----------------------------------------------------|-------------------------------------------------------------------------|--------------|----------------------------------------------------------|
| NATURE                                              |                                                                         | DA           |                                                          |
| BOS<br>Filler                                       | <b>yeah so</b> find a tv series called armageddon summer                | Keyb         | find a tv <b>seriesS</b> called <b>armageddon</b> summer |
| PreV<br>Filler                                      | <b>basically</b> find a tv series called armageddon summer              | Spell        | <b>fine</b> a tv <b>serie</b> called armageddon summer   |
| PosV<br>Filler                                      | find <b>you know</b> a tv series called armageddon summer               | Syn.         | find a tv <b>set</b> series called armageddon summertime |
| EOS<br>Filler                                       | find a tv series called armageddon summer <b>if it pleases mi liege</b> | Ant.         | <b>lose</b> a tv series called armageddon summer         |
| Syn.<br>V.                                          | <b>finds</b> a tv series called armageddon summer                       | TF<br>IDF    | find tv series called armageddon <b>forms</b>            |
| Syn.<br>Adj.                                        | find a tv series called <b>last</b> summer                              | Ctxt.<br>WE. | find a <b>second</b> series called armageddon <b>ii</b>  |
| Syn.<br>Adv.                                        | find a <b>another</b> series called armageddon summer                   |              |                                                          |
| Syn.<br>SW                                          | find <b>and</b> tv series called armageddon summer                      |              |                                                          |
| Speak                                               | find a tv <b>serie</b> called armageddon summer                         |              |                                                          |

Table 4: Nature and DA candidates for the same utterance.

| Test Set        | <b>ATIS</b>  |                 |              | <b>SNIPS</b> |                 |              | <b>NLU-ED</b> |                 |              |
|-----------------|--------------|-----------------|--------------|--------------|-----------------|--------------|---------------|-----------------|--------------|
|                 | Slot<br>(F1) | Intent<br>(Acc) | E2E<br>(Acc) | Slot<br>(F1) | Intent<br>(Acc) | E2E<br>(Acc) | Slot<br>(F1)  | Intent<br>(Acc) | E2E<br>(Acc) |
| Stack-Prop+BERT |              |                 |              |              |                 |              |               |                 |              |
| Original        | 94.7         | 95.7            | 83.3         | 93.8         | 97.7            | 85.3         | 72.4          | 83.8            | 66.2         |
| Random          | 91.7         | 94.3            | 69.2         | 85.7         | 96.0            | 64.4         | 67.3          | 75.6            | 56.7         |
|                 | $\pm 0.0$    | $\pm 0.1$       | $\pm 0.9$    | $\pm 0.2$    | $\pm 0.4$       | $\pm 1.5$    | $\pm 0.2$     | $\pm 0.1$       | $\pm 0.2$    |
| Hard            | 87.2         | 91.0            | 54.0         | 72.7         | 95.1            | 27.1         | 55.3          | 64.0            | 40.7         |
| Bi-RNN          |              |                 |              |              |                 |              |               |                 |              |
| Original        | 93.7         | 96.9            | 81.8         | 86.2         | 97.6            | 69.7         | 66.3          | 82.5            | 61.8         |
| Random          | 90.3         | 93.9            | 65.6         | 77.4         | 95.3            | 48.2         | 61.2          | 73.4            | 51.8         |
| Random          | $\pm 0.1$    | $\pm 0.2$       | $\pm 1.1$    | $\pm 0.3$    | $\pm 0.2$       | $\pm 1.8$    | $\pm 0.1$     | $\pm 0.2$       | $\pm 0.2$    |
| Hard            | 83.2         | 92.8            | 43.0         | 65.0         | 94.1            | 19.1         | 62.1          | 50.2            | 38.6         |

Table 5: Stack-Prop+BERT and Bi-RNN performances for ATIS, SNIPS and NLU-ED using data augmentation on the train and validation sets. We report F1 slot filling, accuracy for intent detection and end-to-end accuracy overall. The reported scores of the Random altered test set are a mean of 10 random distribution of processes and is accompanied by the variance score.
